# Supplementary material
Source: MDPI journal article supplement (https://www.mdpi.com/1999-4907/12/12/1751)
Supplement: s1 [file s1]

## Article

# Shifting Precipitation Patterns Drive Growth Variability and Drought Resilience of European Atlas Cedar Plantations

Jesús Julio Camarero <sup>1,\*</sup>, Antonio Gazol <sup>1</sup>, Michele Colangelo <sup>1,2</sup>, Juan Carlos Linares <sup>3</sup>, Rafael M. Navarro-Cerrillo <sup>4</sup>, Álvaro Rubio-Cuadrado <sup>5</sup>, Fernando Silla <sup>6</sup>, Pierre-Jean Dumas <sup>7</sup> and François Courbet <sup>7</sup>

**Citation:** Camarero, J.J.; Gazol, A.; Colangelo, M.; Linares, J.C.; Navarro-Cerrillo, R.M.; Rubio-Cuadrado, Á.; Silla, F.; Dumas, P.-J.; Courbet, F. Shifting Precipitation Patterns Drive Growth Variability and Drought Resilience of European Atlas Cedar Plantations. *Forests* **2021**, *12*, 1751. <https://doi.org/10.3390/f12121751>

Academic Editor: Daniele Castagneri

Received: 10 November 2021

Accepted: 9 December 2021

Published: 11 December 2021

**Publisher's Note:** MDPI stays neutral with regard to jurisdictional claims in published maps and institutional affiliations.

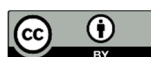

**Copyright:** © 2021 by the authors. Licensee MDPI, Basel, Switzerland. This article is an open access article distributed under the terms and conditions of the Creative Commons Attribution (CC BY) license (<http://creativecommons.org/licenses/by/4.0/>).

- <sup>1</sup> Instituto Pirenaico de Ecología (IPE-CSIC), 50192 Zaragoza, Spain; agazolbu@gmail.com (A.G.); michelecolangelo3@gmail.com (M.C.)
  - <sup>2</sup> School of Agricultural, Forest, Food and Environmental Sciences (SAFE), University of Basilicata, 85100 Potenza, Italy
  - <sup>3</sup> Departamento de Sistemas Físicos, Químicos y Naturales, Universidad Pablo de Olavide, 41013 Sevilla, Spain; jclincal@upo.es
  - <sup>4</sup> Departamento Ingeniería Forestal, Laboratorio de Selvicultura, Dendrocronología y Cambio Climático, DendrodatLab-ERSAF, Campus de Rabanales, Universidad de Córdoba, Crta. IV, km. 396, 14071 Córdoba, Spain; rmnavarro@uco.es
  - <sup>5</sup> Departamento de Sistemas y Recursos Naturales, Escuela Técnica Superior de Ingeniería de Montes, Forestal y del Medio Natural, Universidad Politécnica de Madrid, Ciudad Universitaria s/n, 28040 Madrid, Spain; alvaro.rubio.cuadrado@upm.es
  - <sup>6</sup> Departamento Biología Animal, Parasitología, Ecología, Edafología y Química Agrícola, University Salamanca, Salamanca, Spain; fsilla@usal.es
  - <sup>7</sup> INRAE, UR 629 Ecologie des Forêts Méditerranéennes, URMF, Avignon, France; pierre-jean.dumas@inrae.fr (P.-J.D.); francois.courbet@inrae.fr (F.C.)
- \* Correspondence: jjcamarero@ipe.csic.es; Tel.: +34-976-363-222 (ext. 880041)

**Table S1.** Spearman correlation coefficients calculated at the individual level ( $n = 130$  trees) in Atlas cedar plantations. Variables' abbreviations: Dbh, diameter at breast height (1.3 m); Age, tree age estimated at 1.3 m; TRW, mean tree-ring width; AC1, first-order autocorrelation of ring-width data; MSx, mean sensitivity of ring-width indices; Corr, mean correlation of individual indexed series with the site mean series; NPY, frequency (%) of negative pointer years; Rc, recovery index; Rt, resistance index; Rs, resilience index. Bold values are significant correlation coefficients ( $p < 0.001$ ).

|      | Dbh          | Age           | TRW           | AC1           | MSx          | Corr         | NPY          | Rc           | Rt           |
|------|--------------|---------------|---------------|---------------|--------------|--------------|--------------|--------------|--------------|
| Dbh  |              |               |               |               |              |              |              |              |              |
| Age  | <b>0.598</b> |               |               |               |              |              |              |              |              |
| TRW  | <b>0.399</b> | <b>−0.374</b> |               |               |              |              |              |              |              |
| AC1  | −0.167       | −0.088        | −0.198        |               |              |              |              |              |              |
| MSx  | 0.091        | <b>0.549</b>  | <b>−0.476</b> | <b>−0.362</b> |              |              |              |              |              |
| Corr | 0.119        | 0.164         | 0.052         | <b>−0.279</b> | <b>0.393</b> |              |              |              |              |
| NPY  | 0.008        | <b>0.265</b>  | −0.140        | <b>−0.243</b> | <b>0.478</b> | 0.188        |              |              |              |
| Rc   | 0.185        | <b>0.493</b>  | <b>−0.266</b> | <b>−0.335</b> | <b>0.901</b> | <b>0.418</b> | <b>0.764</b> |              |              |
| Rt   | 0.177        | <b>0.467</b>  | <b>−0.211</b> | <b>−0.300</b> | <b>0.575</b> | 0.170        | <b>0.603</b> | <b>0.619</b> |              |
| Rs   | <b>0.338</b> | <b>0.537</b>  | −0.150        | −0.176        | <b>0.430</b> | 0.071        | <b>0.732</b> | <b>0.645</b> | <b>0.750</b> |

**Table S2.** Linear mixed-effect models selection table. For each response variable (Rt, resistance; Rc, recovery; Rs, resilience), the list of proposed models including the intercept and the three fixed effects (Age at 1.3 m; mean sensitivity, MSx; mean sensitivity; TRW, mean tree-ring width) are shown. The coefficient associated to each variable, the number of degrees of freedom of the model

(df), the Second-order Akaike Information Criterion (AICc), the change in AICc ( $\Delta AICc$ ) and the probability that the selected model is the best models among the ranked models (AICc weight) are shown. The selected models based on AICc and parsimony (i.e., the model with the lowest number of degrees of freedom among those models with a  $\Delta AICc < 2$ ) are highlighted in bold.

| Resilience | Index or (Intercept) | Age          | MSx          | TRW          | df       | AICc            | $\Delta AICc$ | AICc weight  |
|------------|----------------------|--------------|--------------|--------------|----------|-----------------|---------------|--------------|
| Rt         | <b>0.983</b>         | <b>0.000</b> | <b>0.103</b> |              | <b>5</b> | <b>−639.033</b> | <b>0.000</b>  | <b>0.675</b> |
|            | 0.989                | 0.000        | 0.098        | −0.001       | 6        | −637.015        | 2.019         | 0.246        |
|            | 0.994                |              | 0.142        |              | 4        | −633.824        | 5.209         | 0.050        |
|            | 1.008                |              | 0.126        | −0.003       | 5        | −632.636        | 6.397         | 0.028        |
|            | 1.026                | 0.001        |              | −0.005       | 5        | −625.939        | 13.094        | 0.001        |
|            | 1.005                | 0.001        |              |              | 4        | −624.786        | 14.247        | 0.001        |
|            | 1.068                |              |              | −0.009       | 4        | −618.356        | 20.677        | 0.000        |
|            | 1.043                |              |              |              | 3        | −611.745        | 27.288        | 0.000        |
| Rc         | 0.259                | 0.000        | 0.179        | 0.003        | 6        | −903.861        | 0.000         | 0.584        |
|            | <b>0.263</b>         |              | <b>0.186</b> | <b>0.003</b> | <b>5</b> | <b>−902.978</b> | <b>0.884</b>  | <b>0.375</b> |
|            | 0.275                |              | 0.176        |              | 4        | −897.883        | 5.979         | 0.029        |
|            | 0.274                | 0.000        | 0.175        |              | 5        | −896.026        | 7.835         | 0.012        |
|            | 0.332                | 0.000        |              | −0.005       | 5        | −764.280        | 139.581       | 0.000        |
|            | 0.354                |              |              | −0.006       | 4        | −761.541        | 142.320       | 0.000        |
|            | 0.312                | 0.000        |              |              | 4        | −759.209        | 144.652       | 0.000        |
|            | 0.336                |              |              |              | 3        | −752.349        | 151.512       | 0.000        |
| Rs         | <b>0.990</b>         | <b>0.002</b> |              |              | <b>4</b> | <b>−498.364</b> | <b>0.000</b>  | <b>0.393</b> |
|            | 0.980                | 0.001        | 0.053        |              | 5        | −497.501        | 0.863         | 0.255        |
|            | 0.976                | 0.002        |              | 0.004        | 5        | −496.963        | 1.401         | 0.195        |
|            | 0.957                | 0.002        | 0.061        | 0.005        | 6        | −496.520        | 1.844         | 0.156        |
|            | 1.019                |              | 0.156        |              | 4        | −484.464        | 13.900        | 0.000        |
|            | 1.024                |              | 0.151        | −0.001       | 5        | −482.338        | 16.026        | 0.000        |
|            | 1.095                |              |              | −0.008       | 4        | −478.033        | 20.331        | 0.000        |
|            | 1.073                |              |              |              | 3        | −477.845        | 20.519        | 0.000        |

(a)

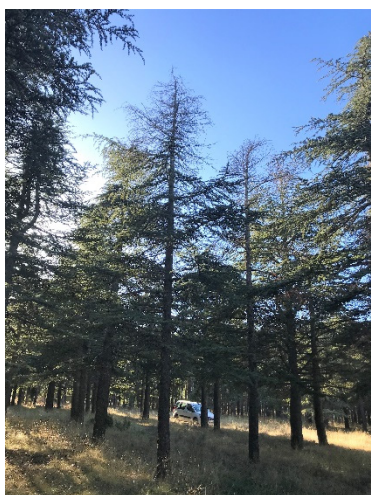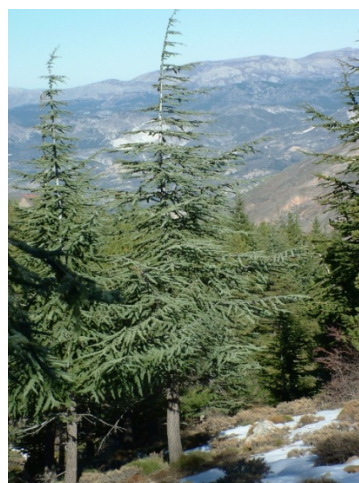

(b)

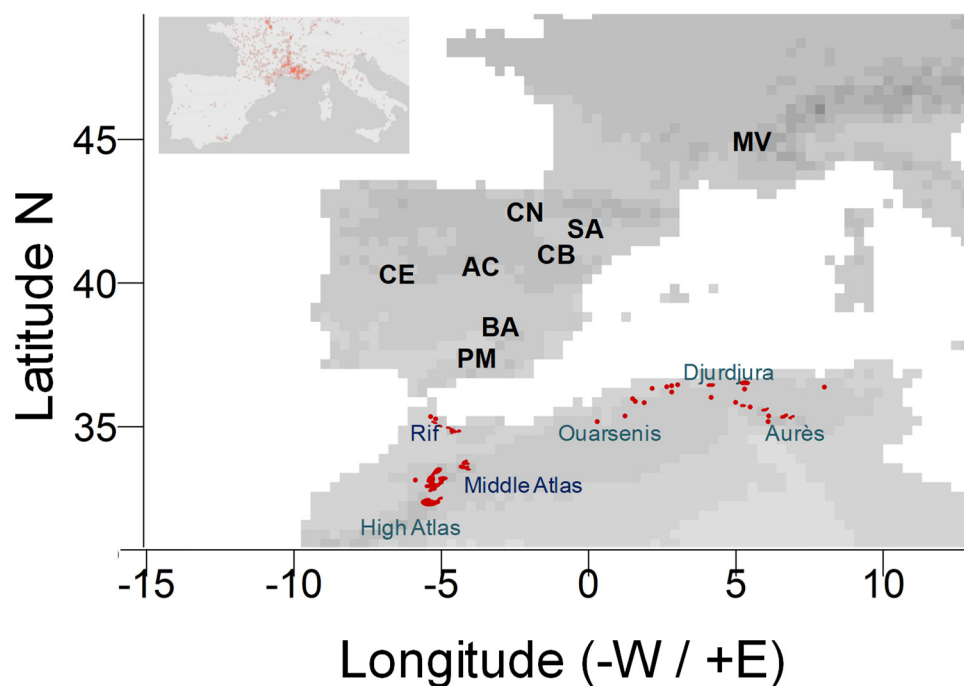

**Figure S1.** Views of (a) two Atlas cedar plantations, and (b) location of the study sites in south-eastern France and Spain. The red dots and patches show the natural distribution of Atlas cedar in northern Morocco and Algeria. The small map in plot (b) shows localities where Atlas cedar occurrences were reported in the Global Biodiversity Information Facility web page (<https://www.gbif.org/>).

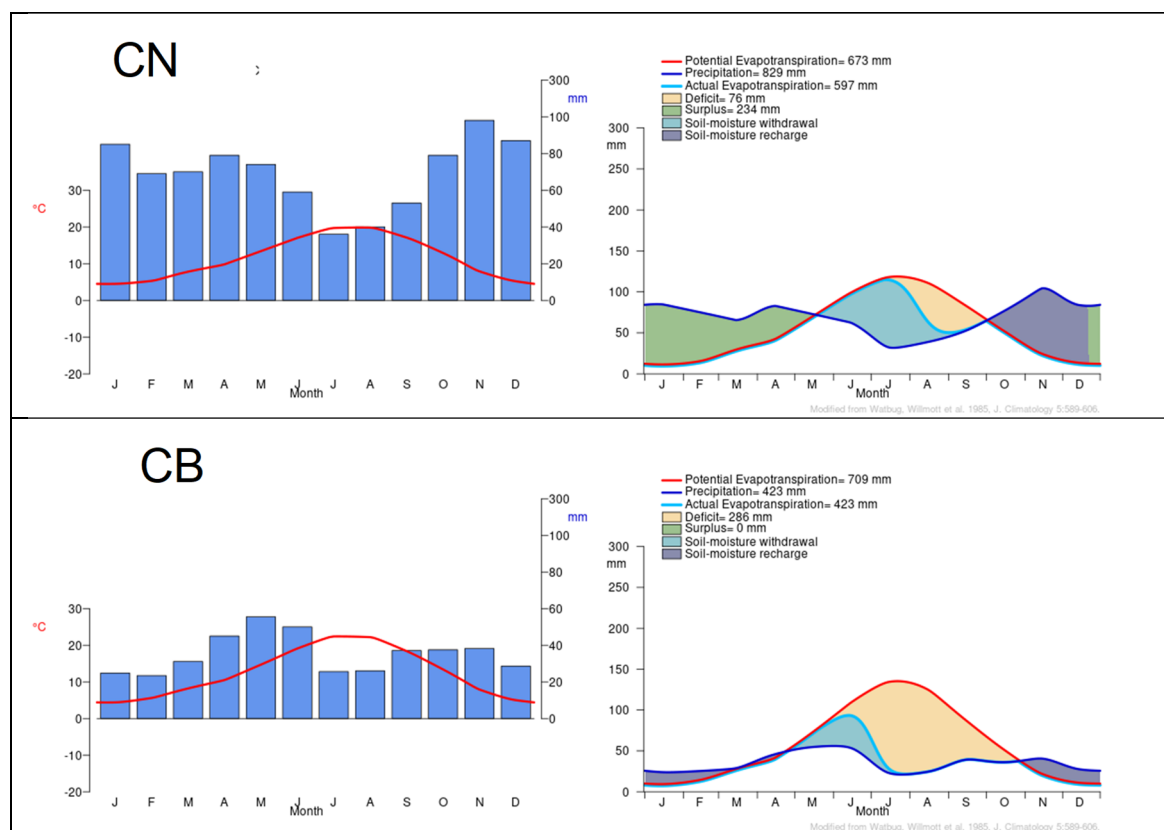

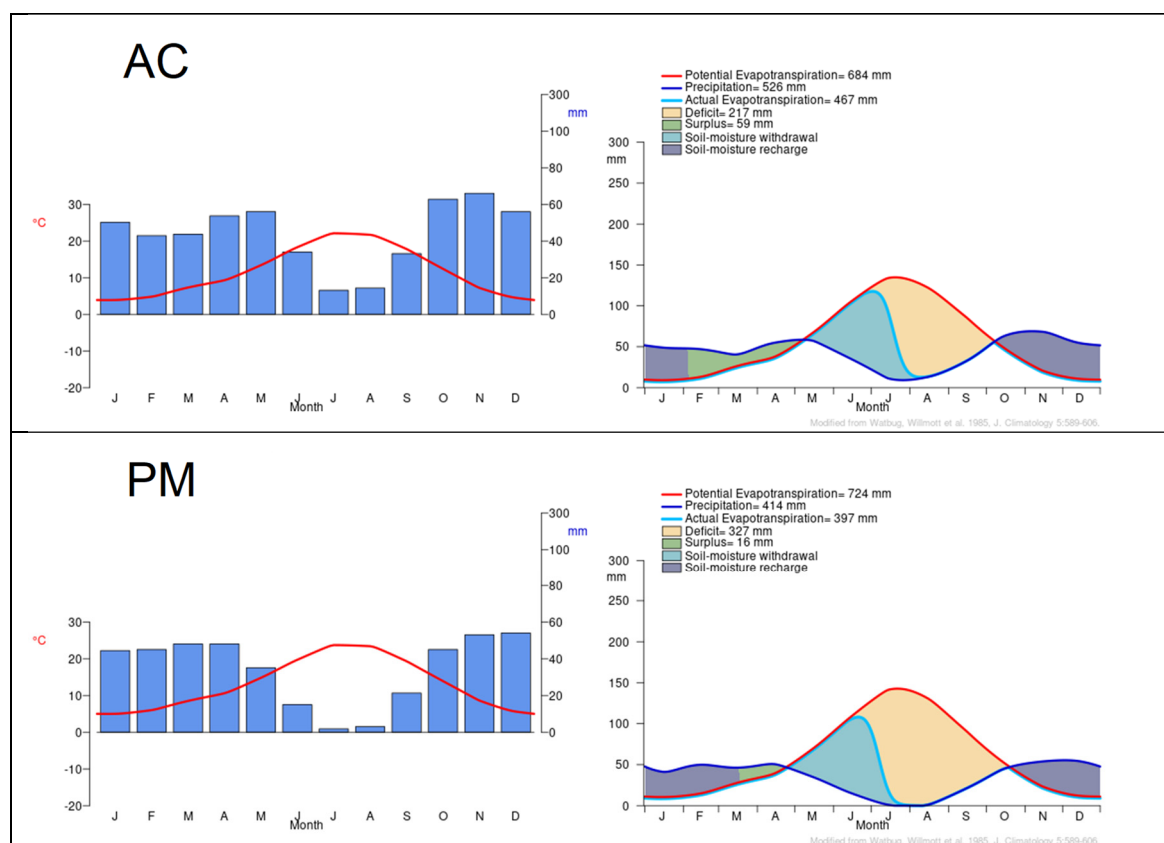

**Figure S2.** Climate diagrams and water balance plots from selected study sites (see sites' abbreviations in Table 1).

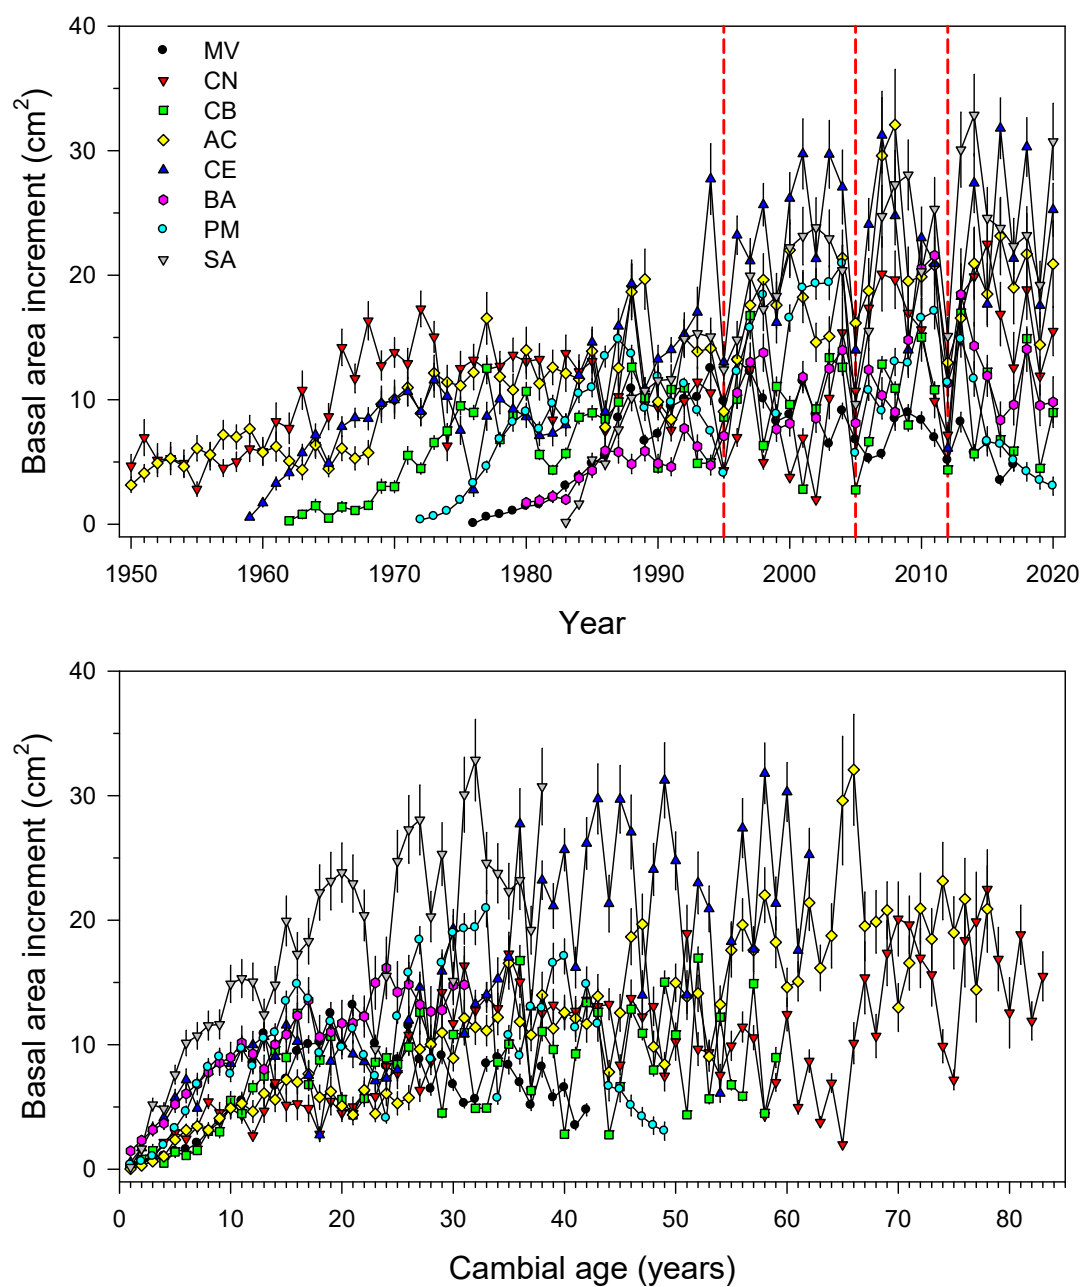

**Figure S3.** Series of basal area increment for the eight study Atlas cedar plantations plotted as a function of year or cambial age (in years). Values are means  $\pm$  SE. In the uppermost plot the dashed vertical lines indicate the 1995, 2005 and 2012 droughts.

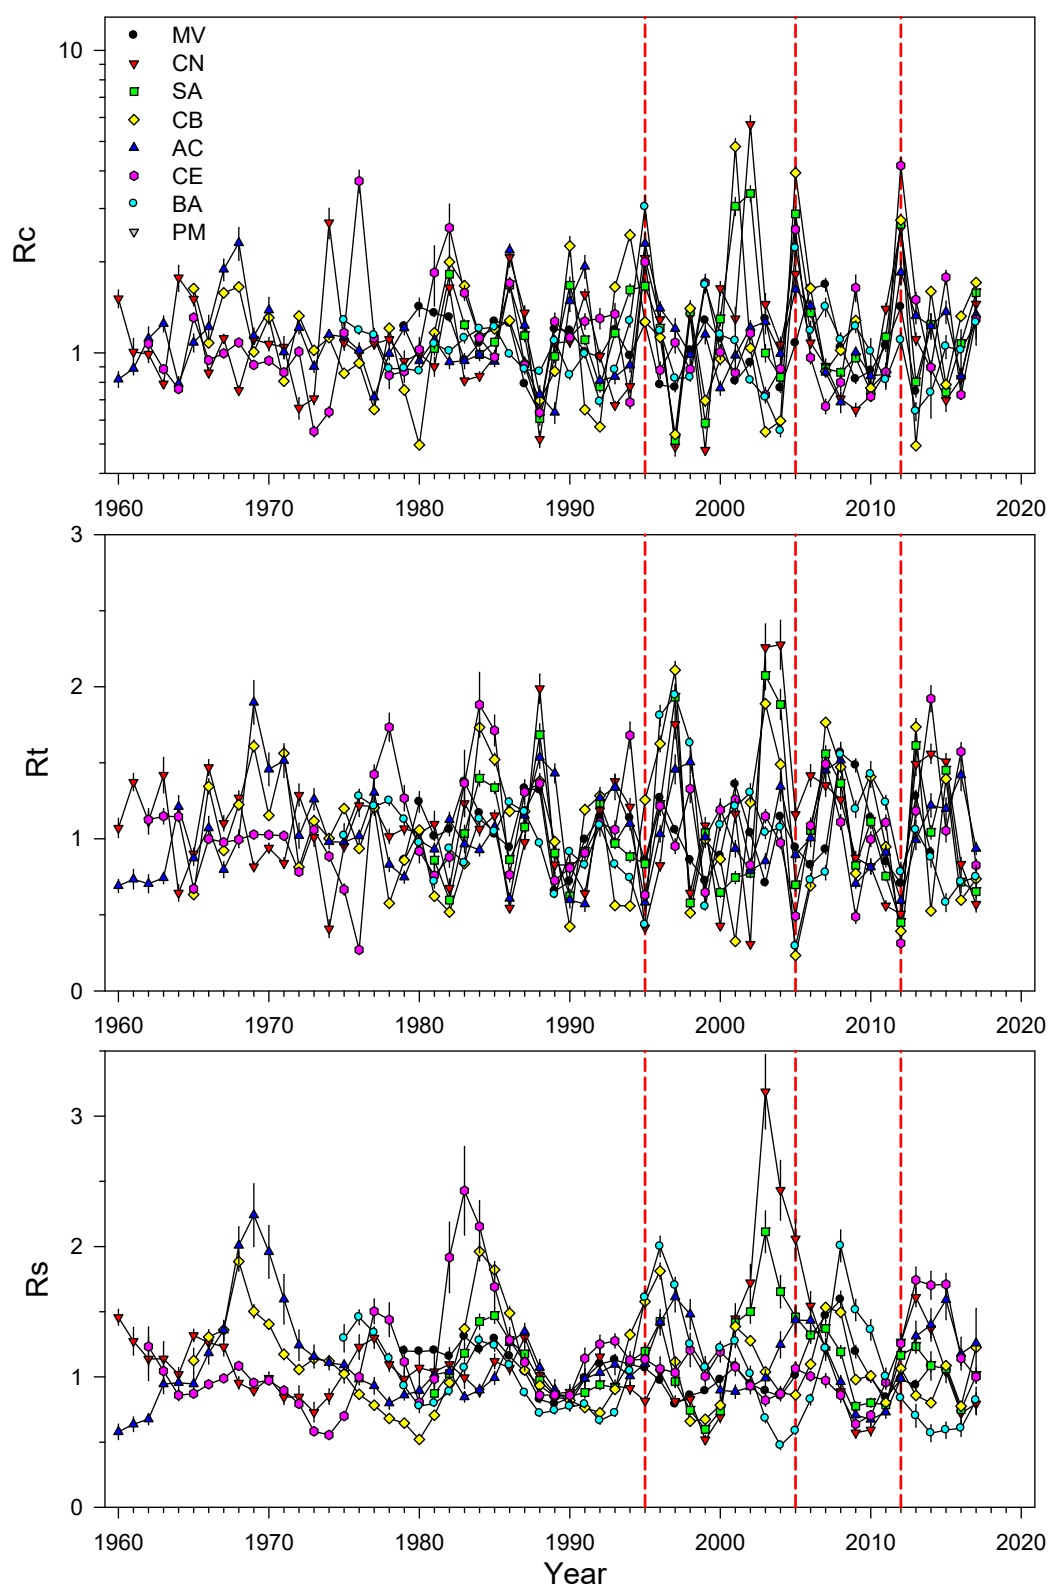

**Figure S4.** Resilience indices (Rc, recovery; Rt, resistance; Rs, resilience) calculated for the study Atlas cedar plantations. Values are means  $\pm$  SE. See sites' codes in Table 1. The dashed vertical lines indicate the 1995, 2005 and 2012 droughts.

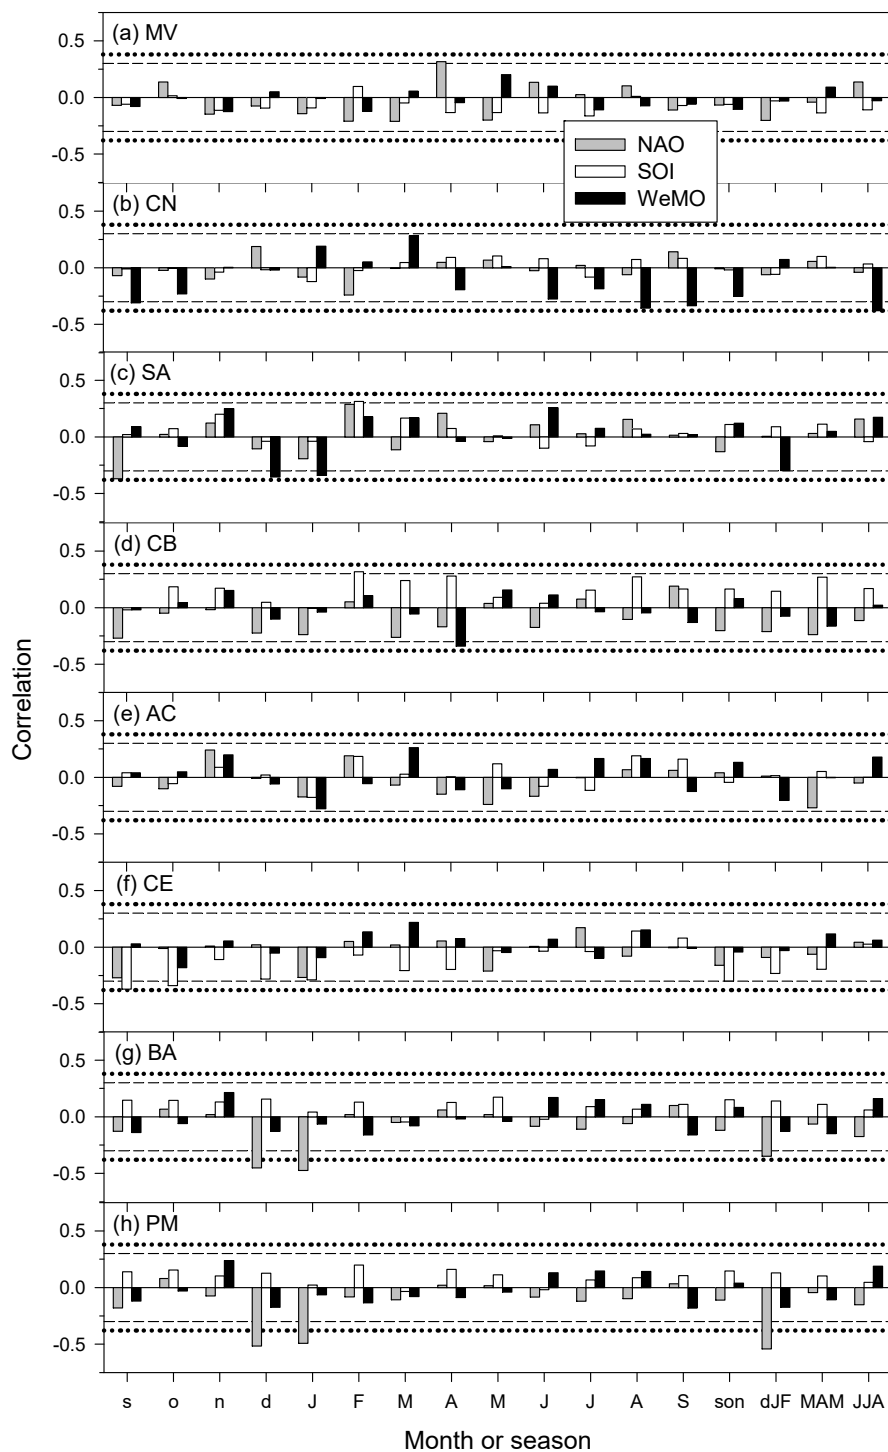

**Figure S5.** Climate indices-growth relationships assessed in eight Atlas cedar plantations (see sites' codes in Table 1). Bars show the Pearson correlations calculated by relating monthly or seasonal data of climate indices representing different atmospheric circulation patterns (NAO, SOI and WeMO) and sites' mean series of ring-width indices. Correlations were calculated from prior to current September and month abbreviated by lowercase and uppercase letters correspond to the previous and current years, respectively. Horizontal dashed and dotted lines indicate the 0.05 and 0.01 significance levels, respectively.

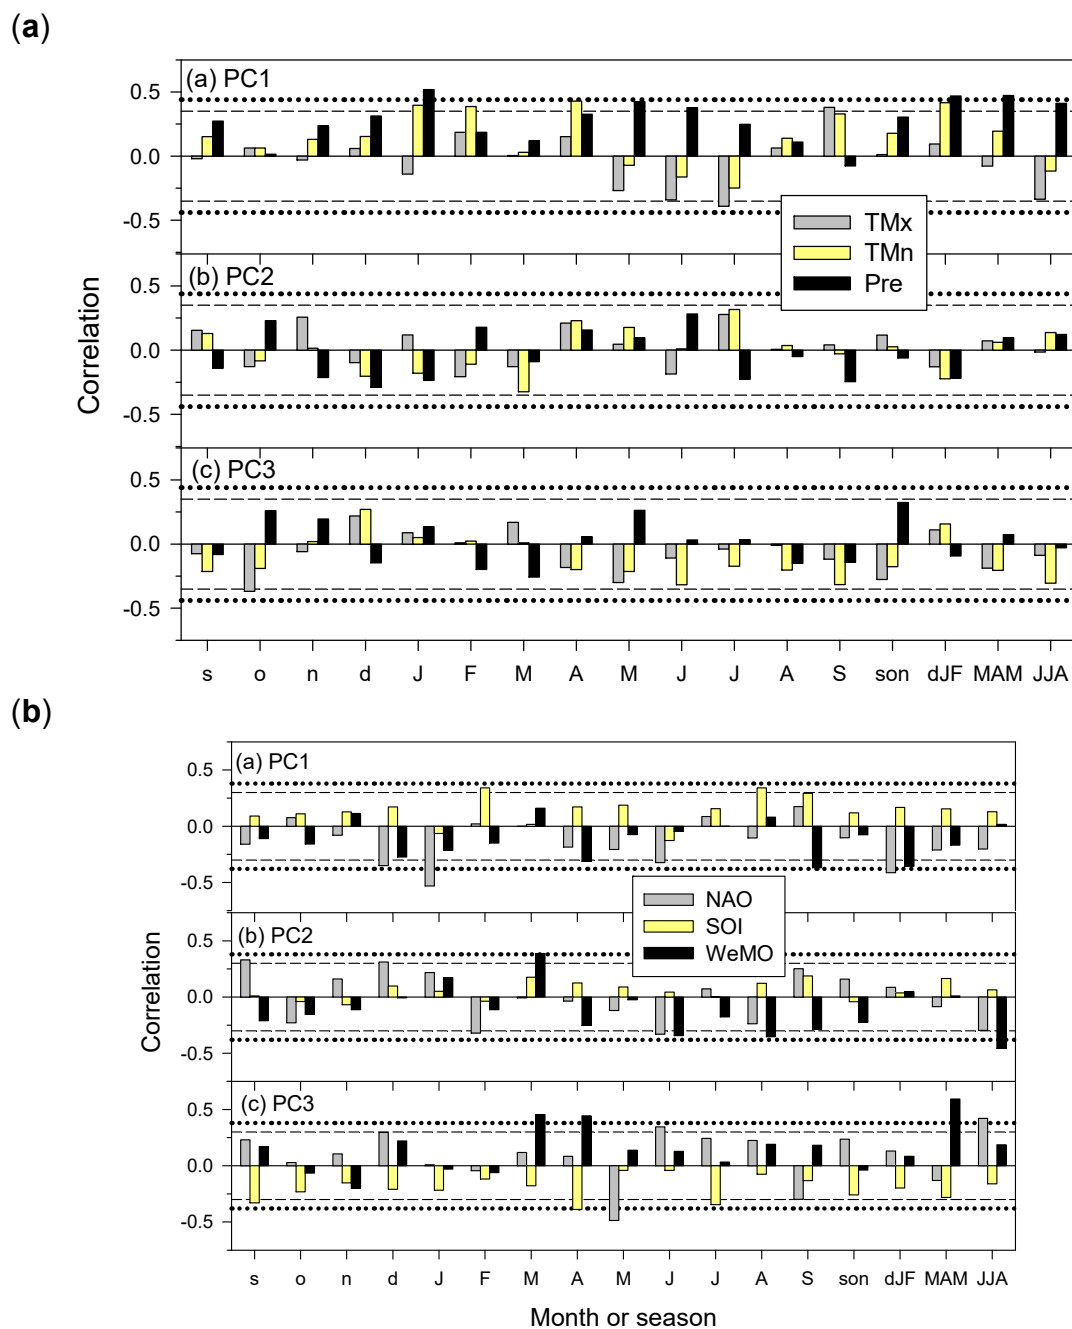

**Figure S6.** (a) Climate- and (b) climate indices-growth relationships assessed in the first principal components (a, PC1; b, PC2; and c, PC3) calculated on the matrix of ring-width series from eight Atlas cedar plantations (see sites' codes in Table 1). Bars show the Pearson correlations calculated by relating monthly or seasonal data of climate data (mean maximum – TMx– and minimum – TMn– temperatures, total precipitation –Pre) or indices (NAO, SOI and WeMO) and sites' mean series of ring-width indices. Climate data were obtained for the region delimited by coordinates 5.75 W–1.00° E and 37.00–44.25° N. Correlations were calculated from prior to current September and month abbreviated by lowercase and upper-case letters correspond to the previous and current years, respectively. Horizontal dashed and dotted lines indicate the 0.05 and 0.01 significance levels, respectively.
